# Supplementary material for: High and Heterogeneous Prevalence of Asymptomatic and Sub-microscopic Malaria Infections on Islands in Lake Victoria, Kenya
Source: PubMed Central journal article supplement (PMC5107902; doi:10.1038/srep36958), 2016-11-14
Supplement: srep36958-s1.pdf [file srep36958-s1.pdf]

## Legend supplementary data

### High and Heterogeneous Prevalence of Asymptomatic and Sub-microscopic Malaria Infections on Islands in Lake Victoria, Kenya

Zulkarnain Md Idris<sup>1, 2</sup>, Chim W. Chan<sup>1</sup>, James Kongere<sup>3</sup>, Jesse Gitaka<sup>4</sup>, John Logedi<sup>5</sup>, Ahmeddin Omar<sup>5</sup>, Charles Obonyo<sup>6</sup>, Beatrice Kemunto Machini<sup>5</sup>, Rie Isozumi<sup>7</sup>, Isao Teramoto<sup>7</sup>, Masatsugu Kimura<sup>7</sup>, Akira Kaneko<sup>1, 7, 8\*</sup>

<sup>1</sup> Island Malaria Group, Department of Microbiology, Tumor and Cell Biology, Karolinska Institutet, Stockholm, 17177, Sweden

<sup>2</sup> Department of Parasitology and Medical Entomology, Faculty of Medicine, Universiti Kebangsaan Malaysia Medical Centre, Kuala Lumpur, 56000, Malaysia

<sup>3</sup> Nagasaki University Nairobi Research Station, NUITM-KEMRI Project, Nairobi, 00202, Kenya

<sup>4</sup> Department of Clinical Medicine, Mount Kenya University, Thika, 01000, Kenya

<sup>5</sup> National Malaria Control Programme, Ministry of Public Health, Nairobi, 00100, Kenya

<sup>6</sup> Kenya Medical Research Institute (KEMRI), Centre for Global Health Research, Kisumu, 40100, Kenya

<sup>7</sup> Department of Parasitology, Graduate School of Medicine, Osaka City University, Osaka, 558-8585, Japan

<sup>8</sup> Institute of Tropical Medicine, Nagasaki University, Nagasaki, 852-8102, Japan

\*corresponding.akira.kaneko@ki.se

**Supplementary Table S1** Demographic and clinical characteristics of the study population, by survey.

**Supplementary Table S2** Univariate associations with malaria parasite density estimate by microscopy.

**Supplementary Table S3** Proportion of individual with sub-microscopic infection (PCR positive but microscopy negative) by setting in all surveys.

**Supplementary Table S1**

| Attributes                               | Category         | Total<br>N = 10450 |                  | January-February 2012<br>N = 2586 |                  | July-August 2012<br>N = 2668 |                  | August 2013<br>N = 2253 |                  | March 2014<br>N = 771 |                  | August 2014<br>N = 2172 |                  |
|------------------------------------------|------------------|--------------------|------------------|-----------------------------------|------------------|------------------------------|------------------|-------------------------|------------------|-----------------------|------------------|-------------------------|------------------|
|                                          |                  | n                  | % (95% CI)       | n                                 | % (95% CI)       | n                            | % (95% CI)       | n                       | % (95% CI)       | n                     | % (95% CI)       | n                       | % (95% CI)       |
| <b>Demographic characteristics</b>       |                  |                    |                  |                                   |                  |                              |                  |                         |                  |                       |                  |                         |                  |
| Gender*                                  | Male             | 4993               | 47.8 (46.8-48.7) | 1208                              | 46.7 (44.8-48.7) | 1308                         | 49.1 (47.4-51.0) | 1089                    | 48.4 (46.3-50.4) | 385                   | 49.9 (46.3-53.5) | 1003                    | 46.2 (44.1-48.3) |
|                                          | Female           | 5453               | 52.2 (51.2-53.1) | 1378                              | 53.3 (51.3-55.2) | 1358                         | 50.9 (49.0-52.9) | 1163                    | 51.6 (49.6-53.7) | 386                   | 50.1 (46.5-53.7) | 1168                    | 53.8 (51.7-55.9) |
| Median age (years, IQR)                  |                  | 10 (6 - 19)        |                  | 11 (6 - 15)                       |                  | 10 (6 - 20)                  |                  | 11 (5 - 22)             |                  | 9 (6 - 14)            |                  | 10 (6 - 20)             |                  |
| Age group (years)**                      | 0 - 5            | 2530               | 24.2 (23.4-25.1) | 639                               | 24.7 (23.1-26.4) | 636                          | 23.8 (22.2-25.5) | 565                     | 25.1 (23.3-26.9) | 189                   | 24.5 (21.5-27.7) | 501                     | 23.1 (21.3-24.9) |
|                                          | 6 - 10           | 2814               | 26.9 (26.1-27.8) | 645                               | 25.0 (23.3-26.7) | 757                          | 28.4 (26.7-30.1) | 524                     | 23.3 (21.5-25.1) | 291                   | 37.7 (34.3-41.3) | 597                     | 27.5 (25.6-29.4) |
|                                          | 11 - 15          | 2168               | 20.8 (20.0-21.5) | 708                               | 27.4 (25.7-29.2) | 478                          | 17.9 (16.5-19.4) | 405                     | 18.0 (16.4-19.6) | 118                   | 15.3 (12.8-18.0) | 459                     | 21.1 (19.4-22.9) |
|                                          | 16 - 30          | 1580               | 15.1 (14.4-15.8) | 318                               | 12.3 (11.1-13.6) | 458                          | 17.2 (15.8-18.7) | 409                     | 18.2 (16.6-19.8) | 79                    | 10.3 (8.2-12.6)  | 316                     | 14.6 (13.1-16.1) |
|                                          | >30              | 1354               | 13.0 (12.3-13.6) | 274                               | 10.6 (9.4-11.9)  | 339                          | 12.7 (11.5-14.0) | 349                     | 15.5 (14.0-17.1) | 94                    | 12.2 (10.0-14.7) | 298                     | 13.8 (12.3-15.2) |
| <b>Setting</b>                           |                  |                    |                  |                                   |                  |                              |                  |                         |                  |                       |                  |                         |                  |
| Coast                                    | Ungoye           | 2819               | 26.9 (26.1-27.8) | 622                               | 24.1 (22.4-25.7) | 617                          | 23.1 (21.5-24.8) | 720                     | 32.0 (30.0-33.9) | 317                   | 41.1 (37.6-44.7) | 543                     | 25.0 (23.2-26.9) |
| Large island                             | Mfangano         | 3706               | 35.5 (34.5-36.4) | 890                               | 34.4 (32.6-36.3) | 1120                         | 42.0 (40.1-43.9) | 790                     | 35.1 (33.1-37.1) | nd                    | nd               | 906                     | 41.7 (36.6-43.8) |
| Small islands                            | Takawiri         | 1684               | 16.1 (15.4-16.8) | 601                               | 23.2 (21.6-24.9) | 435                          | 16.3 (14.9-17.8) | 286                     | 12.7 (11.3-14.1) | nd                    | nd               | 362                     | 16.7 (15.1-18.3) |
|                                          | Kibuogi          | 900                | 8.6 (8.1-9.2)    | 130                               | 5.0 (4.2-5.9)    | 206                          | 7.7 (6.7-8.8)    | 204                     | 9.0 (7.9-10.3)   | 211                   | 27.4 (24.2-30.7) | 149                     | 6.9 (5.8-8.0)    |
|                                          | Ngodhe           | 1341               | 12.8 (12.2-13.5) | 343                               | 13.3 (12.0-14.6) | 290                          | 10.9 (9.7-12.1)  | 253                     | 11.2 (10.0-12.6) | 243                   | 31.5 (28.2-34.9) | 212                     | 9.7 (8.5-11.1)   |
| <b>Clinical characteristics</b>          |                  |                    |                  |                                   |                  |                              |                  |                         |                  |                       |                  |                         |                  |
| Measured fever (axillary >37.5°C)        |                  | 10445              | 5.5 (5.1-6.0)    | 2586                              | 6.8 (5.8-7.7)    | 2666                         | 4.8 (4.0-5.6)    | 2251                    | 4.1 (3.3-4.9)    | 771                   | 10.4 (8.2-12.5)  | 2171                    | 4.8 (3.9-5.7)    |
| Enlarged spleen (children ≤12 year olds) |                  | 6561               | 38.9 (37.7-40.1) | 1676                              | 36.4 (34.1-38.7) | 1554                         | 44.7 (42.2-47.1) | 1479                    | 36.9 (34.4-39.3) | 539                   | 47.1 (42.9-51.4) | 1313                    | 34.2 (31.6-36.8) |
| Hackett's grade for enlarged spleen      | 0 (not enlarged) | 4009               | 61.1 (59.9-62.3) | 1066                              | 63.6 (61.2-65.9) | 860                          | 55.3 (52.8-57.8) | 934                     | 63.2 (60.6-65.6) | 285                   | 52.9 (48.7-57.2) | 864                     | 65.8 (63.2-68.4) |
|                                          | 1                | 1116               | 17.0 (16.1-17.9) | 292                               | 17.4 (15.6-19.3) | 289                          | 18.6 (16.7-20.6) | 241                     | 16.3 (14.4-18.3) | 92                    | 17.1 (14.0-20.5) | 202                     | 15.4 (13.5-17.5) |
|                                          | 2                | 1114               | 17.0 (16.1-17.9) | 267                               | 15.9 (14.2-17.8) | 310                          | 20.0 (18.0-22.0) | 236                     | 16.0 (14.1-17.9) | 116                   | 21.5 (18.1-25.2) | 185                     | 14.1 (12.3-16.1) |
|                                          | 3                | 304                | 4.6 (4.1-5.2)    | 50                                | 3.0 (2.2-3.9)    | 91                           | 5.9 (4.7-7.1)    | 63                      | 4.3 (3.3-5.4)    | 41                    | 7.6 (5.5-10.2)   | 59                      | 4.5 (3.4-5.8)    |
|                                          | 4                | 18                 | 0.3 (0.2-0.4)    | 1                                 | 0.1 (0.0-0.3)    | 4                            | 0.3 (0.1-0.7)    | 5                       | 0.3 (0.1-0.8)    | 5                     | 0.9 (0.3-2.2)    | 3                       | 0.2 (0.0-0.7)    |
| Anaemia (<11 g/dL)                       |                  | 10437              | 22.0 (21.2-22.8) | 2586                              | 20.7 (19.2-22.3) | 2663                         | 20.7 (19.1-22.2) | 2249                    | 23.1 (21.3-24.8) | 770                   | 28.8 (25.6-32.0) | 2169                    | 21.6 (19.8-23.3) |

N = number of participants sampled, n = number of participants tested, nd = not done, IQR = interquartile range, CI = confidence interval  
 Not all participants were recorded for each parameter, therefore percentage were calculated based on the number of available in each survey  
 \*4 individual with no gender recorded (Aug. 2012; 2, Aug. 2013; 1, Aug. 2014; 1)  
 \*\*4 individual with no age recorded (Jan. 2012; 2, Aug. 2013; 1, Aug. 2014; 1)

**Supplementary Table S2**

| Attributes                                     | Category | n    | Geometric mean of parasite density (parasite/ $\mu$ L) | Regression coefficients | 95% CI             | P-value |
|------------------------------------------------|----------|------|--------------------------------------------------------|-------------------------|--------------------|---------|
| <b>Demographic characteristics</b>             |          |      |                                                        |                         |                    |         |
| Age group (years)                              | 0 - 5    | 570  | 2023                                                   |                         | Ref                |         |
|                                                | 6 - 10   | 743  | 1374                                                   | -5624.04                | -7494.9, -3754.2   | <0.001  |
|                                                | 11 - 15  | 490  | 675                                                    | -7625.69                | -9695.6, -5555.8   |         |
|                                                | 16 - 30  | 135  | 494                                                    | -6405.71                | -9621.8, -3189.6   |         |
|                                                | >30      | 90   | 412                                                    | -8147.03                | -111958.1, -4335.9 |         |
| Setting                                        | Ungoye   | 1091 | 1114                                                   |                         | Ref                |         |
|                                                | Mfangano | 700  | 1141                                                   | -704.71                 | -2356.4, 946.9     | 0.589   |
|                                                | Takawiri | 95   | 1257                                                   | -1018.47                | -4666.9, 2629.9    |         |
|                                                | Kibuogi  | 50   | 1671                                                   | 989.37                  | -3943.2, 5922.0    |         |
|                                                | Ngodhe   | 92   | 1152                                                   | 2124.1                  | -1578.6, 5826.8    |         |
| <b>Clinical Characteristics</b>                |          |      |                                                        |                         |                    |         |
| Measured fever (axillary>37.5°C)               | No       | 1817 | 1014                                                   |                         | Ref                |         |
|                                                | Yes      | 211  | 3188                                                   | 12534.13                | 10114.6, 14953.7   | <0.001  |
| Enlarged spleen (children $\leq$ 12 year olds) | No       | 482  | 893                                                    |                         | Ref                |         |
|                                                | Yes      | 1157 | 1659                                                   | 197.65                  | -1680.3, 2075.6    | 0.837   |
| Hackett's grade for enlarged spleen            | 0        | 482  | 893                                                    |                         | Ref                |         |
|                                                | 1        | 362  | 1234                                                   | -1350.10                | -3754.4, 1054.2    | 0.044   |
|                                                | 2        | 582  | 1705                                                   | 40.76                   | -2088.3, 2169.8    |         |
|                                                | 3        | 204  | 2534                                                   | 3443.27                 | 555.8, 6330.7      |         |
|                                                | 4        | 9    | 2940                                                   | -969.69                 | -12599.9, 10660.5  |         |
| Anaemia (<11 g/dL)                             | No       | 1421 | 863                                                    |                         | Ref                |         |
|                                                | Yes      | 606  | 2201                                                   | 5413.79                 | 3775.7, 7051.9     | <0.001  |

n = number of participant with parasite count, CI = confidence interval

**Supplementary Table S3**

| <b>Variable</b> | <b>Category</b> | <b>N</b> | <b>n</b> | <b>% (95% CI)</b>  | <b>P-value</b> |
|-----------------|-----------------|----------|----------|--------------------|----------------|
| <b>Setting</b>  | Ungoye          | 1771     | 735      | 41.5 (39.2 - 43.8) | <0.001         |
|                 | Mfangano        | 1480     | 821      | 55.5 (52.9 - 58.0) |                |
|                 | Takawiri        | 253      | 165      | 65.2 (59.0 - 71.1) |                |
|                 | Kibuogi         | 134      | 85       | 63.4 (54.7 - 71.6) |                |
|                 | Ngodhe          | 221      | 140      | 63.3 (56.6 - 69.7) |                |

N = total number of microscopic and sub-microscopic individuals, n = number of individuals with sub-microscopic infections, CI = confidence interval
